# Supplementary material
Source: Springer Nature journal article supplement (https://www.springermedizin.de/resource/supplementary/13014_2010_239_MOESM3_ESM.pdf/9633252)

**a****Lung**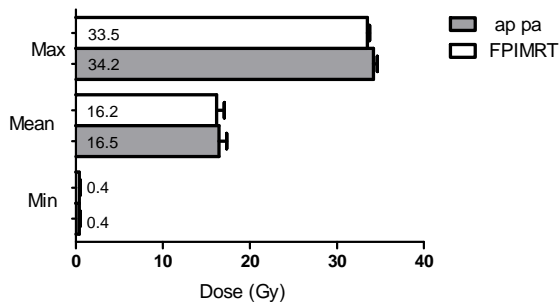**b****Heart**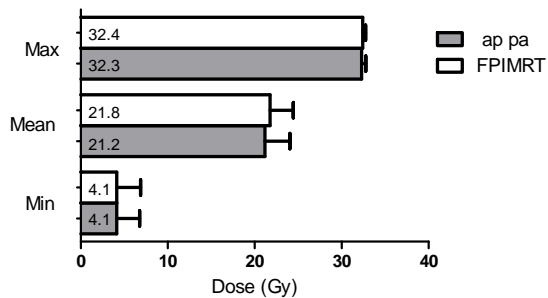**c****Thyroid**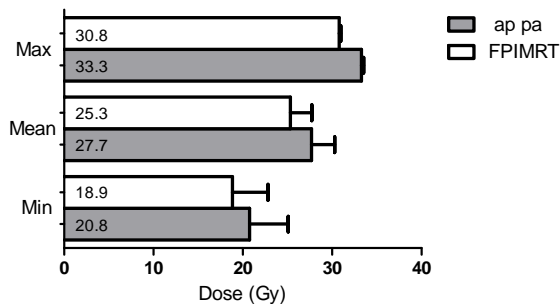**d****Spinal Cord**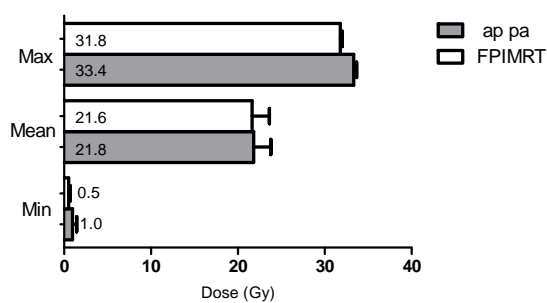**e****Breast**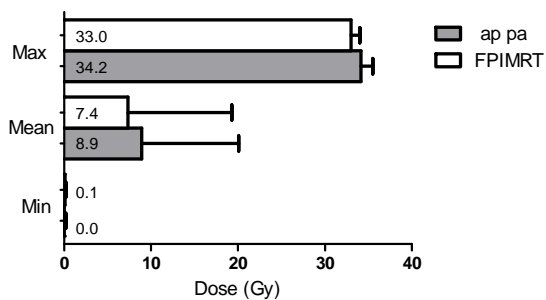

Supplement: MOESM3 [file 9633252]
